# Supplementary material
Source: Royal Society of Chemistry journal article supplement (doi:10.1039/d6cp01222a)
Supplement: d6cp01222a1.pdf [file d6cp01222a1.pdf]

# **Supplementary - Gaunt and Breit Two-electron contributions to Mean-field Transformations and Fine Structure Splitting**

Luca Murg,<sup>\*,†,‡</sup> Christopher Lane,<sup>†</sup> and Roxanne M. Tutchton<sup>†</sup>

<sup>†</sup>*Theoretical Division, Los Alamos National Laboratory, Los Alamos, New Mexico 87545,  
USA*

<sup>‡</sup>*Department of Nuclear, Plasma, and Radiological Engineering, University of Illinois at  
Urbana-Champaign, Urbana, USA*

E-mail: rtutchton@lanl.gov

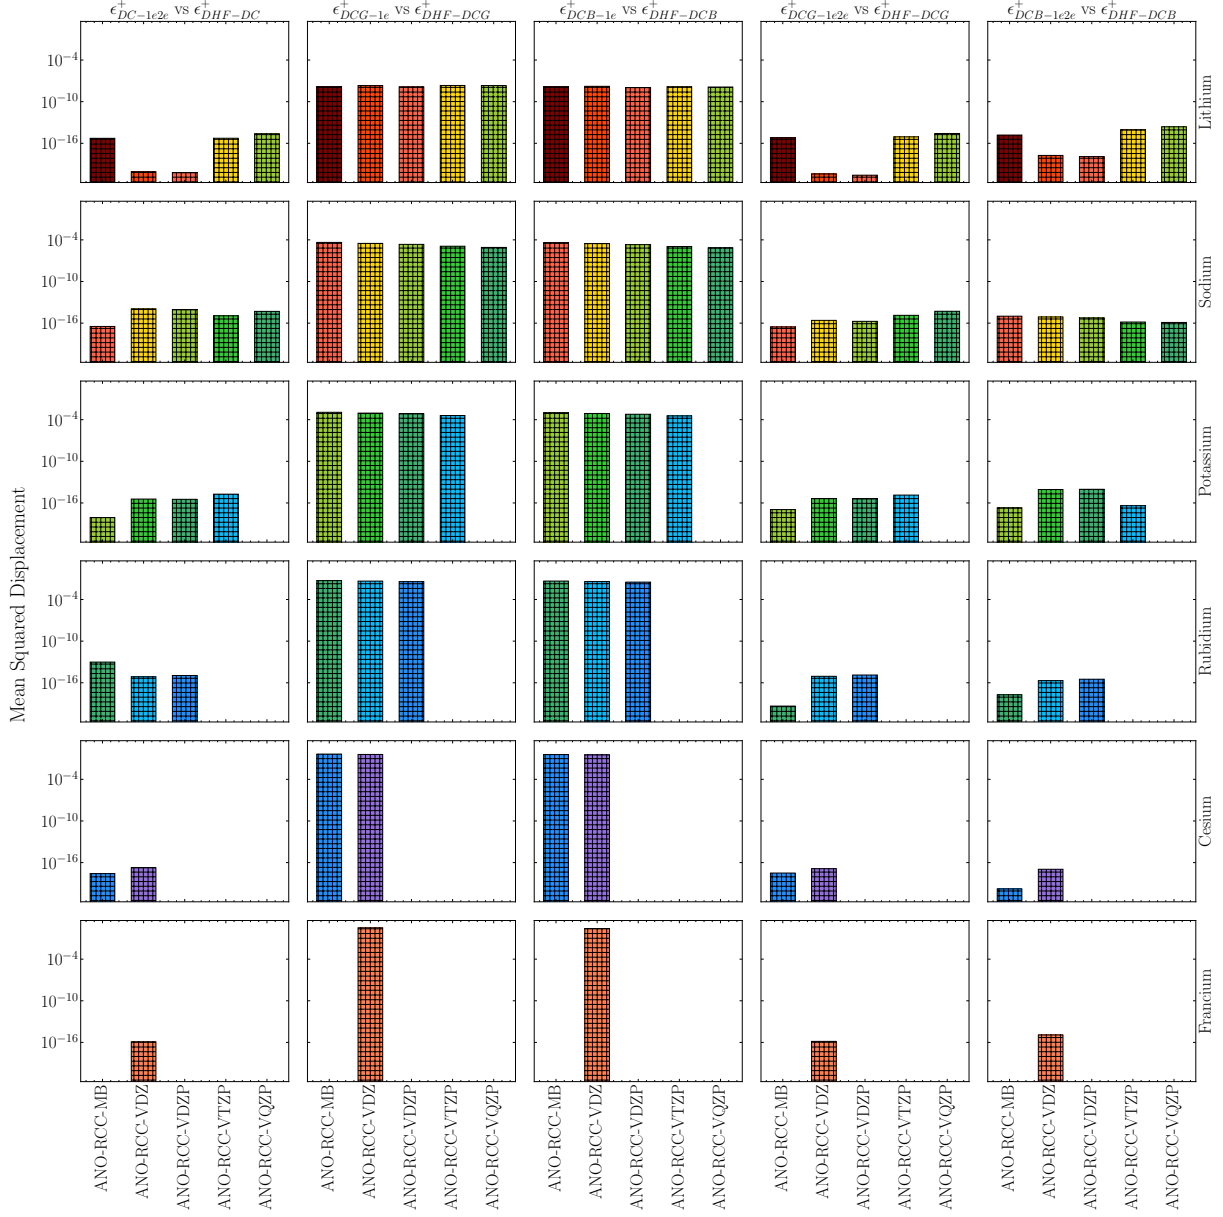

Figure S1: Mean squared displacement of positive energy spectrum after  $X2C_{mmf}$  using DC-1e2e, DCG-1e, and DGB-1e, DCG-1e2e, and DCB-1e2e transformation versus the respective positive energy spectrum from 4c DHF using DC, DCG, and DCB Hamiltonian in a variety of basis sets ( $MSD = \frac{1}{n} \sum_{i=1}^n |\epsilon_{i,4c-DHF}^+ - \epsilon_{i,2c}^+|^2$ , units are Hartree).

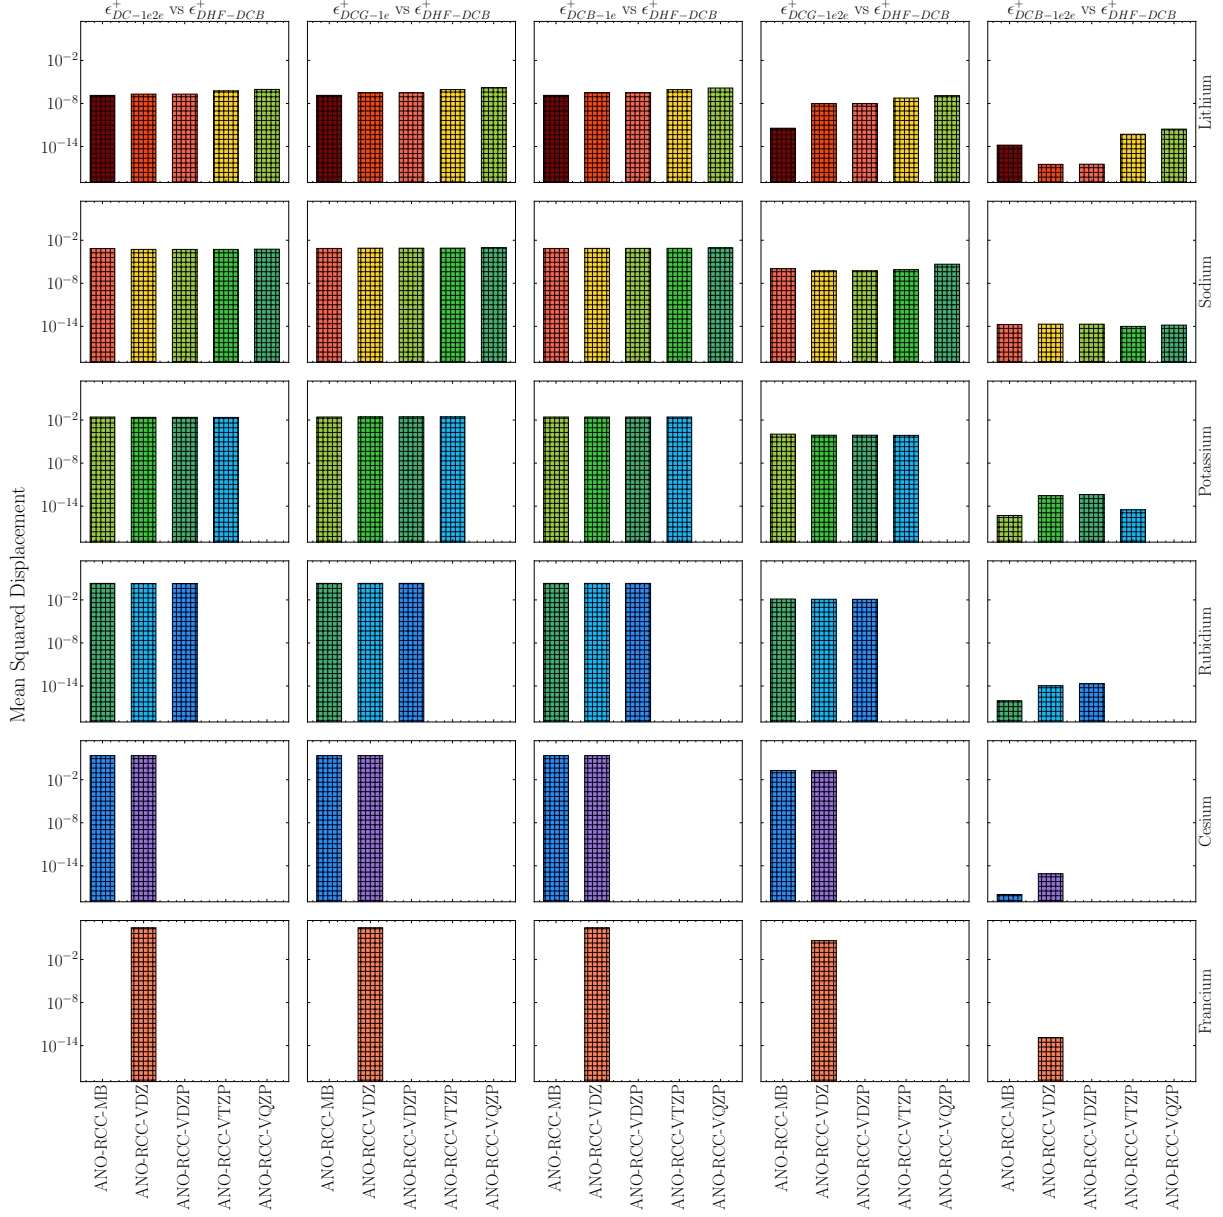

Figure S2: Mean squared displacement of positive energy spectrum after  $X2C_{mmf}$  using DC-1e2e, DCG-1e, and DGB-1e, DCG-1e2e, and DCB-1e2e transformation versus the absolute value of positive energy spectrum from 4c DHF using the DCB Hamiltonian in a variety of basis sets ( $MSD = \frac{1}{n} \sum_{i=1}^n |\epsilon_{i,4c-DHF-DCB}^+ - \epsilon_{i,2c}^+|^2$ , units are Hartree).

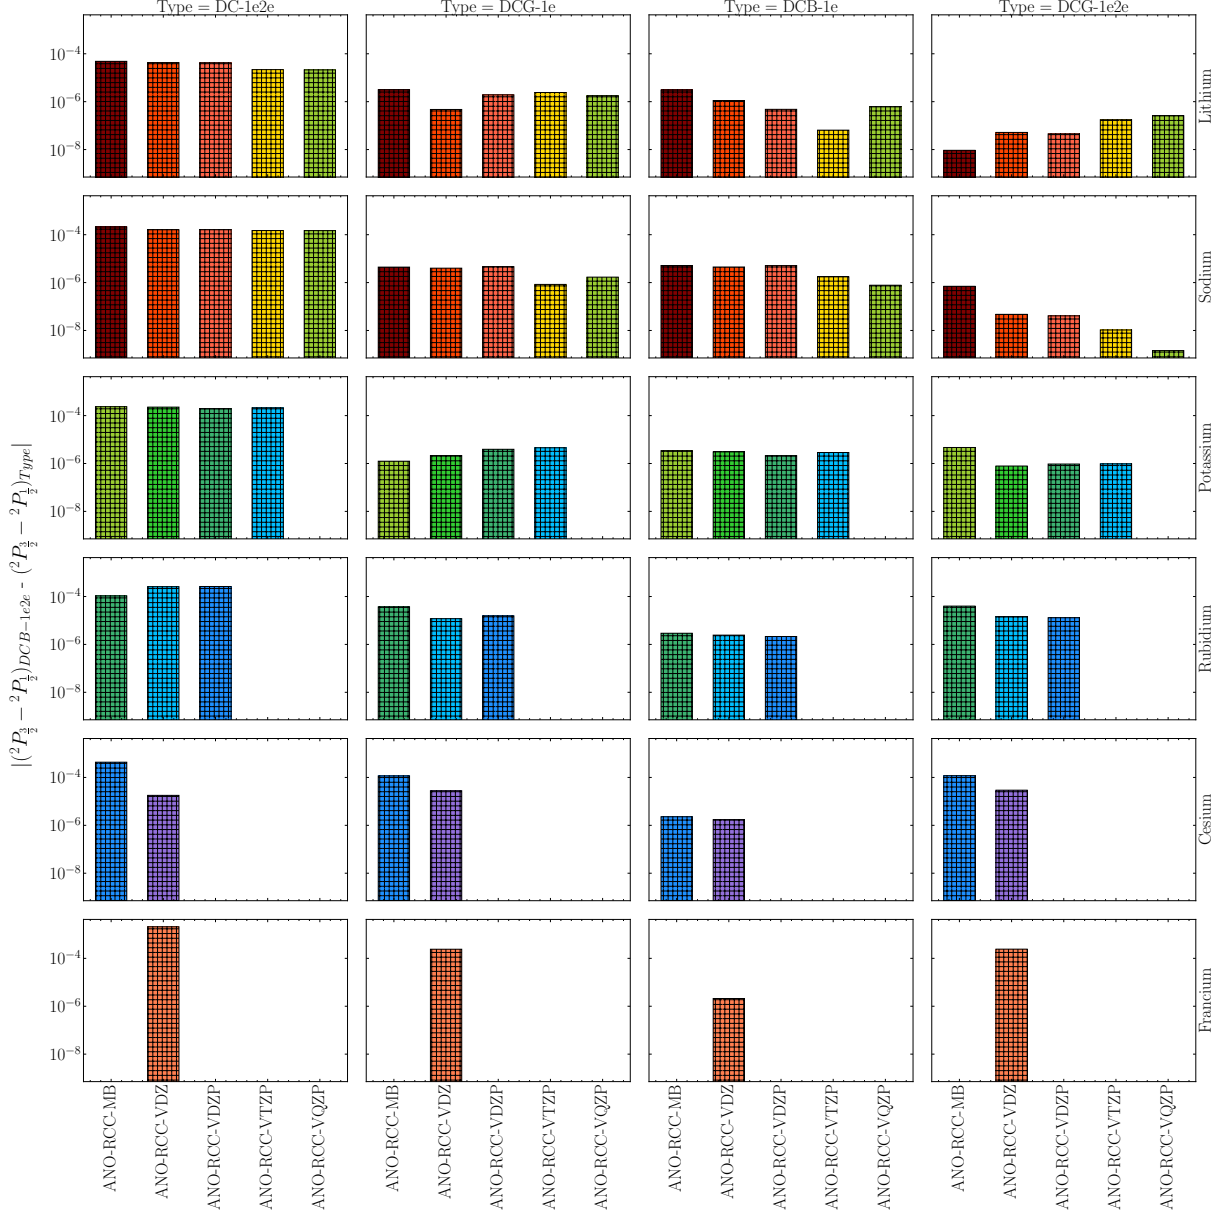

Figure S3: Absolute difference of fine structure splitting predicted using the DC-1e2e, DCG-1e, DCB-1e, and DCG-1e2e transformation versus the DCB-1e2e transformation for various basis sets calculated using EOM-CCSD-X2C<sub>mmf</sub>-DHF in a variety of basis sets (units are eV).

Table S1: Lithium's excitations for varying basis types and  $X2C_{mmf}$  trasformation types, calculated using 4c DHF, Kramers unrestricted EOM-CCSD with eV units of energy.

| Basis        | Excitation                                      | Experiment | DC-1e2e | DCG-1e | DCB-1e | DCG-1e2e | DCB-1e2e |
|--------------|-------------------------------------------------|------------|---------|--------|--------|----------|----------|
| ANO-RCC-MB   | $2S_{\frac{1}{2}} \rightarrow 2P_{\frac{1}{2}}$ | 1.8478     | 1.8467  | 1.8467 | 1.8467 | 1.8467   | 1.8467   |
|              | $2S_{\frac{1}{2}} \rightarrow 2P_{\frac{3}{2}}$ | 1.8479     | 1.8468  | 1.8467 | 1.8467 | 1.8467   | 1.8467   |
| ANO-RCC-VDZ  | $2S_{\frac{1}{2}} \rightarrow 2P_{\frac{1}{2}}$ | 1.8478     | 1.8437  | 1.8436 | 1.8436 | 1.8436   | 1.8436   |
|              | $2S_{\frac{1}{2}} \rightarrow 2P_{\frac{3}{2}}$ | 1.8479     | 1.8438  | 1.8437 | 1.8437 | 1.8437   | 1.8437   |
| ANO-RCC-VDZP | $2S_{\frac{1}{2}} \rightarrow 2P_{\frac{1}{2}}$ | 1.8478     | 1.8369  | 1.8368 | 1.8368 | 1.8368   | 1.8368   |
|              | $2S_{\frac{1}{2}} \rightarrow 2P_{\frac{3}{2}}$ | 1.8479     | 1.8370  | 1.8369 | 1.8369 | 1.8369   | 1.8369   |
| ANO-RCC-VTZP | $2S_{\frac{1}{2}} \rightarrow 2P_{\frac{1}{2}}$ | 1.8478     | 1.8434  | 1.8434 | 1.8434 | 1.8434   | 1.8434   |
|              | $2S_{\frac{1}{2}} \rightarrow 2P_{\frac{3}{2}}$ | 1.8479     | 1.8436  | 1.8435 | 1.8435 | 1.8435   | 1.8435   |
| ANO-RCC-VQZP | $2S_{\frac{1}{2}} \rightarrow 2P_{\frac{1}{2}}$ | 1.8478     | 1.8455  | 1.8454 | 1.8454 | 1.8454   | 1.8454   |
|              | $2S_{\frac{1}{2}} \rightarrow 2P_{\frac{3}{2}}$ | 1.8479     | 1.8456  | 1.8455 | 1.8455 | 1.8456   | 1.8455   |

Table S2: Sodium's excitations for varying basis types and  $X2C_{mmf}$  trasformation types, calculated using 4c DHF, Kramers unrestricted EOM-CCSD with eV units of energy.

| Basis        | Excitation                                      | Experiment | DC-1e2e | DCG-1e | DCB-1e | DCG-1e2e | DCB-1e2e |
|--------------|-------------------------------------------------|------------|---------|--------|--------|----------|----------|
| ANO-RCC-MB   | $2S_{\frac{1}{2}} \rightarrow 2P_{\frac{1}{2}}$ | 2.1023     | 2.0198  | 2.0199 | 2.0198 | 2.0199   | 2.0198   |
|              | $2S_{\frac{1}{2}} \rightarrow 2P_{\frac{3}{2}}$ | 2.1044     | 2.0228  | 2.0227 | 2.0226 | 2.0227   | 2.0226   |
| ANO-RCC-VDZ  | $2S_{\frac{1}{2}} \rightarrow 2P_{\frac{1}{2}}$ | 2.1023     | 1.9891  | 1.9891 | 1.9891 | 1.9891   | 1.9890   |
|              | $2S_{\frac{1}{2}} \rightarrow 2P_{\frac{3}{2}}$ | 2.1044     | 1.9914  | 1.9913 | 1.9912 | 1.9913   | 1.9912   |
| ANO-RCC-VDZP | $2S_{\frac{1}{2}} \rightarrow 2P_{\frac{1}{2}}$ | 2.1023     | 1.9870  | 1.9870 | 1.9870 | 1.9870   | 1.9870   |
|              | $2S_{\frac{1}{2}} \rightarrow 2P_{\frac{3}{2}}$ | 2.1044     | 1.9894  | 1.9892 | 1.9892 | 1.9892   | 1.9892   |
| ANO-RCC-VTZP | $2S_{\frac{1}{2}} \rightarrow 2P_{\frac{1}{2}}$ | 2.1023     | 2.0460  | 2.0459 | 2.0459 | 2.0459   | 2.0459   |
|              | $2S_{\frac{1}{2}} \rightarrow 2P_{\frac{3}{2}}$ | 2.1044     | 2.0483  | 2.0481 | 2.0481 | 2.0481   | 2.0480   |
| ANO-RCC-VQZP | $2S_{\frac{1}{2}} \rightarrow 2P_{\frac{1}{2}}$ | 2.1023     | 2.0755  | 2.0755 | 2.0755 | 2.0755   | 2.0754   |
|              | $2S_{\frac{1}{2}} \rightarrow 2P_{\frac{3}{2}}$ | 2.1044     | 2.0778  | 2.0776 | 2.0776 | 2.0777   | 2.0776   |

Table S3: Potassium's excitations for varying basis types and  $X2C_{mmf}$  trasformation types, calculated using 4c DHF, Kramers unrestricted EOM-CCSD with eV units of energy.

| Basis        | Excitation                                      | Experiment | DC-1e2e | DCG-1e | DCB-1e | DCG-1e2e | DCB-1e2e |
|--------------|-------------------------------------------------|------------|---------|--------|--------|----------|----------|
| ANO-RCC-MB   | $2S_{\frac{1}{2}} \rightarrow 2P_{\frac{1}{2}}$ | 1.6100     | 1.4465  | 1.4466 | 1.4466 | 1.4466   | 1.4466   |
|              | $2S_{\frac{1}{2}} \rightarrow 2P_{\frac{3}{2}}$ | 1.6171     | 1.4539  | 1.4538 | 1.4537 | 1.4538   | 1.4537   |
| ANO-RCC-VDZ  | $2S_{\frac{1}{2}} \rightarrow 2P_{\frac{1}{2}}$ | 1.6100     | 1.4467  | 1.4471 | 1.4470 | 1.4471   | 1.4469   |
|              | $2S_{\frac{1}{2}} \rightarrow 2P_{\frac{3}{2}}$ | 1.6171     | 1.4533  | 1.4534 | 1.4533 | 1.4534   | 1.4533   |
| ANO-RCC-VDZP | $2S_{\frac{1}{2}} \rightarrow 2P_{\frac{1}{2}}$ | 1.6100     | 1.5678  | 1.5681 | 1.5680 | 1.5681   | 1.5680   |
|              | $2S_{\frac{1}{2}} \rightarrow 2P_{\frac{3}{2}}$ | 1.6171     | 1.5755  | 1.5756 | 1.5755 | 1.5756   | 1.5755   |
| ANO-RCC-VTZP | $2S_{\frac{1}{2}} \rightarrow 2P_{\frac{1}{2}}$ | 1.6100     | 1.6275  | 1.6277 | 1.6276 | 1.6277   | 1.6276   |
|              | $2S_{\frac{1}{2}} \rightarrow 2P_{\frac{3}{2}}$ | 1.6171     | 1.6352  | 1.6351 | 1.6350 | 1.6351   | 1.6350   |

Table S4: Rubidium's excitations for varying basis types and  $X2C_{mmf}$  trasformation types, calculated using 4c DHF, Kramers unrestricted EOM-CCSD with eV units of energy.

| Basis        | Excitation                                      | Experiment | DC-1e2e | DCG-1e | DCB-1e | DCG-1e2e | DCB-1e2e |
|--------------|-------------------------------------------------|------------|---------|--------|--------|----------|----------|
| ANO-RCC-MB   | $2S_{\frac{1}{2}} \rightarrow 2P_{\frac{1}{2}}$ | 1.5596     | 1.3455  | 1.3449 | 1.3448 | 1.3448   | 1.3448   |
|              | $2S_{\frac{1}{2}} \rightarrow 2P_{\frac{3}{2}}$ | 1.5890     | 1.3675  | 1.3668 | 1.3668 | 1.3668   | 1.3668   |
| ANO-RCC-VDZ  | $2S_{\frac{1}{2}} \rightarrow 2P_{\frac{1}{2}}$ | 1.5596     | 1.3665  | 1.3676 | 1.3673 | 1.3676   | 1.3673   |
|              | $2S_{\frac{1}{2}} \rightarrow 2P_{\frac{3}{2}}$ | 1.5890     | 1.3900  | 1.3908 | 1.3905 | 1.3908   | 1.3905   |
| ANO-RCC-VDZP | $2S_{\frac{1}{2}} \rightarrow 2P_{\frac{1}{2}}$ | 1.5596     | 1.5174  | 1.5183 | 1.5180 | 1.5183   | 1.5180   |
|              | $2S_{\frac{1}{2}} \rightarrow 2P_{\frac{3}{2}}$ | 1.5890     | 1.5414  | 1.5420 | 1.5417 | 1.5420   | 1.5417   |

Table S5: Cesium's excitations for varying basis types and  $X2C_{mmf}$  trasformation types, calculated using 4c DHF, Kramers unrestricted EOM-CCSD with eV units of energy.

| Basis       | Excitation                        | Experiment | DC-1e2e | DCG-1e | DCB-1e | DCG-1e2e | DCB-1e2e |
|-------------|-----------------------------------|------------|---------|--------|--------|----------|----------|
| ANO-RCC-MB  | $^2S_{1/2} \rightarrow ^2P_{1/2}$ | 1.3859     | 1.2419  | 1.2420 | 1.2419 | 1.2420   | 1.2419   |
|             | $^2S_{1/2} \rightarrow ^2P_{3/2}$ | 1.4546     | 1.2927  | 1.2934 | 1.2932 | 1.2934   | 1.2932   |
| ANO-RCC-VDZ | $^2S_{1/2} \rightarrow ^2P_{1/2}$ | 1.3859     | 1.2962  | 1.2988 | 1.2982 | 1.2988   | 1.2982   |
|             | $^2S_{1/2} \rightarrow ^2P_{3/2}$ | 1.4546     | 1.3492  | 1.3517 | 1.3511 | 1.3517   | 1.3511   |

Table S6: Francium's excitations for varying basis types and  $X2C_{mmf}$  trasformation types, calculated using 4c DHF, Kramers unrestricted EOM-CCSD with eV units of energy.

| Basis       | Excitation                        | Experiment | DC-1e2e | DCG-1e | DCB-1e | DCG-1e2e | DCB-1e2e |
|-------------|-----------------------------------|------------|---------|--------|--------|----------|----------|
| ANO-RCC-VDZ | $^2S_{1/2} \rightarrow ^2P_{1/2}$ | 1.5172     | 1.8296  | 1.8407 | 1.8390 | 1.8407   | 1.8390   |
|             | $^2S_{1/2} \rightarrow ^2P_{3/2}$ | 1.7264     | 1.9839  | 1.9973 | 1.9954 | 1.9973   | 1.9954   |

Table S7: Tabulated atom type,  $X2C_{mmf}$  transformation type, basis, PySCF converged 4c DHF energy, converged unrestricted Kramers CCSD energy correction, and converged PySCF CCSD energy correction.

| Atom | $X2C_{mmf}$ Type | Basis        | $E_{DHF}^{PySCF}$ [Ha] | $\Delta E_{CCSD}^{This Work}$ [Ha] | $\Delta E_{CCSD}^{PySCF}$ [Ha] |
|------|------------------|--------------|------------------------|------------------------------------|--------------------------------|
| Li   | DC-1e2e          | ANO-RCC-MB   | -7.43337869            | -4.58212741E-05                    | -4.58212741E-05                |
| Li   | DC-1e2e          | ANO-RCC-VDZ  | -7.43349063            | -1.61383218E-02                    | -1.61383218E-02                |
| Li   | DC-1e2e          | ANO-RCC-VDZP | -7.43349063            | -1.61401491E-02                    | -1.61401491E-02                |
| Li   | DC-1e2e          | ANO-RCC-VTZP | -7.43350415            | -3.65209750E-02                    | -3.65209750E-02                |
| Li   | DC-1e2e          | ANO-RCC-VQZP | -7.43351115            | -3.90337186E-02                    | -3.90337186E-02                |
| Li   | DCG-1e           | ANO-RCC-MB   | -7.43337869            | -4.58212741E-05                    | -4.58212741E-05                |
| Li   | DCG-1e           | ANO-RCC-VDZ  | -7.43349063            | -1.61383218E-02                    | -1.61383218E-02                |
| Li   | DCG-1e           | ANO-RCC-VDZP | -7.43349063            | -1.61401491E-02                    | -1.61401491E-02                |
| Li   | DCG-1e           | ANO-RCC-VTZP | -7.43350415            | -3.65209750E-02                    | -3.65209750E-02                |
| Li   | DCG-1e           | ANO-RCC-VQZP | -7.43351115            | -3.90337186E-02                    | -3.90337186E-02                |
| Li   | DCB-1e           | ANO-RCC-MB   | -7.43337869            | -4.58212741E-05                    | -4.58212741E-05                |
| Li   | DCB-1e           | ANO-RCC-VDZ  | -7.43349063            | -1.61383218E-02                    | -1.61383218E-02                |
| Li   | DCB-1e           | ANO-RCC-VDZP | -7.43349063            | -1.61401491E-02                    | -1.61401491E-02                |
| Li   | DCB-1e           | ANO-RCC-VTZP | -7.43350415            | -3.65209750E-02                    | -3.65209750E-02                |
| Li   | DCB-1e           | ANO-RCC-VQZP | -7.43351115            | -3.90337186E-02                    | -3.90337186E-02                |
| Li   | DCG-1e2e         | ANO-RCC-MB   | -7.43337869            | -4.58212741E-05                    | -4.58212741E-05                |
| Li   | DCG-1e2e         | ANO-RCC-VDZ  | -7.43349063            | -1.61383218E-02                    | -1.61383218E-02                |
| Li   | DCG-1e2e         | ANO-RCC-VDZP | -7.43349063            | -1.61401491E-02                    | -1.61401491E-02                |
| Li   | DCG-1e2e         | ANO-RCC-VTZP | -7.43350415            | -3.65209750E-02                    | -3.65209750E-02                |
| Li   | DCG-1e2e         | ANO-RCC-VQZP | -7.43351115            | -3.90337186E-02                    | -3.90337186E-02                |
| Li   | DCB-1e2e         | ANO-RCC-MB   | -7.43337869            | -4.58212741E-05                    | -4.58212741E-05                |
| Li   | DCB-1e2e         | ANO-RCC-VDZ  | -7.43349063            | -1.61383218E-02                    | -1.61383218E-02                |
| Li   | DCB-1e2e         | ANO-RCC-VDZP | -7.43349063            | -1.61401491E-02                    | -1.61401491E-02                |
| Li   | DCB-1e2e         | ANO-RCC-VTZP | -7.43350415            | -3.65209750E-02                    | -3.65209750E-02                |
| Li   | DCB-1e2e         | ANO-RCC-VQZP | -7.43351115            | -3.90337186E-02                    | -3.90337186E-02                |

Table S8: Tabulated atom type,  $X2C_{mmf}$  transformation type, basis, PySCF converged 4c DHF energy, converged unrestricted Kramers CCSD energy correction, and converged PySCF CCSD energy correction.

| Atom | $X2C_{mmf}$ Type | Basis        | $E_{DHF}^{PySCF}$ [Ha] | $\Delta E_{CCSD}^{This Work}$ [Ha] | $\Delta E_{CCSD}^{PySCF}$ [Ha] |
|------|------------------|--------------|------------------------|------------------------------------|--------------------------------|
| Na   | DC-1e2e          | ANO-RCC-MB   | -162.05715650          | -2.20078705E-04                    | -2.20078709E-04                |
| Na   | DC-1e2e          | ANO-RCC-VDZ  | -162.05720863          | -1.17564643E-01                    | -1.17564643E-01                |
| Na   | DC-1e2e          | ANO-RCC-VDZP | -162.05720863          | -1.18638412E-01                    | -1.18638412E-01                |
| Na   | DC-1e2e          | ANO-RCC-VTZP | -162.05723287          | -2.03866922E-01                    | -2.03866922E-01                |
| Na   | DC-1e2e          | ANO-RCC-VQZP | -162.05726902          | -2.40431049E-01                    | -2.40431049E-01                |
| Na   | DCG-1e           | ANO-RCC-MB   | -162.05715650          | -2.20078705E-04                    | -2.20078709E-04                |
| Na   | DCG-1e           | ANO-RCC-VDZ  | -162.05720863          | -1.17564643E-01                    | -1.17564643E-01                |
| Na   | DCG-1e           | ANO-RCC-VDZP | -162.05720863          | -1.18638412E-01                    | -1.18638412E-01                |
| Na   | DCG-1e           | ANO-RCC-VTZP | -162.05723287          | -2.03866922E-01                    | -2.03866922E-01                |
| Na   | DCG-1e           | ANO-RCC-VQZP | -162.05726902          | -2.40431049E-01                    | -2.40431049E-01                |
| Na   | DCB-1e           | ANO-RCC-MB   | -162.05715650          | -2.20078705E-04                    | -2.20078709E-04                |
| Na   | DCB-1e           | ANO-RCC-VDZ  | -162.05720863          | -1.17564643E-01                    | -1.17564643E-01                |
| Na   | DCB-1e           | ANO-RCC-VDZP | -162.05720863          | -1.18638412E-01                    | -1.18638412E-01                |
| Na   | DCB-1e           | ANO-RCC-VTZP | -162.05723287          | -2.03866922E-01                    | -2.03866922E-01                |
| Na   | DCB-1e           | ANO-RCC-VQZP | -162.05726902          | -2.40431049E-01                    | -2.40431049E-01                |
| Na   | DCG-1e2e         | ANO-RCC-MB   | -162.05715650          | -2.20078705E-04                    | -2.20078709E-04                |
| Na   | DCG-1e2e         | ANO-RCC-VDZ  | -162.05720863          | -1.17564643E-01                    | -1.17564643E-01                |
| Na   | DCG-1e2e         | ANO-RCC-VDZP | -162.05720863          | -1.18638412E-01                    | -1.18638412E-01                |
| Na   | DCG-1e2e         | ANO-RCC-VTZP | -162.05723287          | -2.03866922E-01                    | -2.03866922E-01                |
| Na   | DCG-1e2e         | ANO-RCC-VQZP | -162.05726902          | -2.40431049E-01                    | -2.40431049E-01                |
| Na   | DCB-1e2e         | ANO-RCC-MB   | -162.05715650          | -2.20078705E-04                    | -2.20078709E-04                |
| Na   | DCB-1e2e         | ANO-RCC-VDZ  | -162.05720863          | -1.17564643E-01                    | -1.17564643E-01                |
| Na   | DCB-1e2e         | ANO-RCC-VDZP | -162.05720863          | -1.18638412E-01                    | -1.18638412E-01                |
| Na   | DCB-1e2e         | ANO-RCC-VTZP | -162.05723287          | -2.03866922E-01                    | -2.03866922E-01                |
| Na   | DCB-1e2e         | ANO-RCC-VQZP | -162.05726902          | -2.40431049E-01                    | -2.40431049E-01                |

Table S9: Tabulated atom type,  $X2C_{mmf}$  transformation type, basis, PySCF converged 4c DHF energy, converged unrestricted Kramers CCSD energy correction, and converged PySCF CCSD energy correction.

| Atom | $X2C_{mmf}$ Type | Basis        | $E_{DHF}^{PySCF}$ [Ha] | $\Delta E_{CCSD}^{This Work}$ [Ha] | $\Delta E_{CCSD}^{PySCF}$ [Ha] |
|------|------------------|--------------|------------------------|------------------------------------|--------------------------------|
| K    | DC-1e2e          | ANO-RCC-MB   | -601.33547064          | -2.81712233E-04                    | -2.81712226E-04                |
| K    | DC-1e2e          | ANO-RCC-VDZ  | -601.33574000          | -4.19427003E-02                    | -4.19427003E-02                |
| K    | DC-1e2e          | ANO-RCC-VDZP | -601.33574000          | -1.88640717E-01                    | -1.88640717E-01                |
| K    | DC-1e2e          | ANO-RCC-VTZP | -601.33586043          | -2.60677803E-01                    | -2.60677804E-01                |
| K    | DCG-1e           | ANO-RCC-MB   | -601.33547064          | -2.81712233E-04                    | -2.81712226E-04                |
| K    | DCG-1e           | ANO-RCC-VDZ  | -601.33574000          | -4.19427003E-02                    | -4.19427003E-02                |
| K    | DCG-1e           | ANO-RCC-VDZP | -601.33574000          | -1.88640717E-01                    | -1.88640717E-01                |
| K    | DCG-1e           | ANO-RCC-VTZP | -601.33586043          | -2.60677803E-01                    | -2.60677804E-01                |
| K    | DCB-1e           | ANO-RCC-MB   | -601.33547064          | -2.81712233E-04                    | -2.81712226E-04                |
| K    | DCB-1e           | ANO-RCC-VDZ  | -601.33574000          | -4.19427003E-02                    | -4.19427003E-02                |
| K    | DCB-1e           | ANO-RCC-VDZP | -601.33574000          | -1.88640717E-01                    | -1.88640717E-01                |
| K    | DCB-1e           | ANO-RCC-VTZP | -601.33586043          | -2.60677803E-01                    | -2.60677804E-01                |
| K    | DCG-1e2e         | ANO-RCC-MB   | -601.33547064          | -2.81712233E-04                    | -2.81712226E-04                |
| K    | DCG-1e2e         | ANO-RCC-VDZ  | -601.33574000          | -4.19427003E-02                    | -4.19427003E-02                |
| K    | DCG-1e2e         | ANO-RCC-VDZP | -601.33574000          | -1.88640717E-01                    | -1.88640717E-01                |
| K    | DCG-1e2e         | ANO-RCC-VTZP | -601.33586043          | -2.60677803E-01                    | -2.60677804E-01                |
| K    | DCB-1e2e         | ANO-RCC-MB   | -601.33547064          | -2.81712233E-04                    | -2.81712226E-04                |
| K    | DCB-1e2e         | ANO-RCC-VDZ  | -601.33574000          | -4.19427003E-02                    | -4.19427003E-02                |
| K    | DCB-1e2e         | ANO-RCC-VDZP | -601.33574000          | -1.88640717E-01                    | -1.88640717E-01                |
| K    | DCB-1e2e         | ANO-RCC-VTZP | -601.33586043          | -2.60677803E-01                    | -2.60677804E-01                |

Table S10: Tabulated atom type,  $X2C_{mmf}$  transformation type, basis, PySCF converged 4c DHF energy, converged unrestricted Kramers CCSD energy correction, and converged PySCF CCSD energy correction.

| Atom | $X2C_{mmf}$ Type | Basis        | $E_{DHF}^{PySCF}$ [Ha] | $\Delta E_{CCSD}^{This Work}$ [Ha] | $\Delta E_{CCSD}^{PySCF}$ [Ha] |
|------|------------------|--------------|------------------------|------------------------------------|--------------------------------|
| Rb   | DC-1e2e          | ANO-RCC-MB   | -2989.57808707         | -2.54348217E-04                    | -2.54348209E-04                |
| Rb   | DC-1e2e          | ANO-RCC-VDZ  | -2989.58340243         | -2.93237276E-02                    | -2.93237276E-02                |
| Rb   | DC-1e2e          | ANO-RCC-VDZP | -2989.58353577         | -1.65029862E-01                    | -1.65029862E-01                |
| Rb   | DCG-1e           | ANO-RCC-MB   | -2989.57808707         | -2.54348217E-04                    | -2.54348209E-04                |
| Rb   | DCG-1e           | ANO-RCC-VDZ  | -2989.58340243         | -2.93237276E-02                    | -2.93237276E-02                |
| Rb   | DCG-1e           | ANO-RCC-VDZP | -2989.58353577         | -1.65029862E-01                    | -1.65029862E-01                |
| Rb   | DCB-1e           | ANO-RCC-MB   | -2989.57808707         | -2.54348217E-04                    | -2.54348209E-04                |
| Rb   | DCB-1e           | ANO-RCC-VDZ  | -2989.58340243         | -2.93237276E-02                    | -2.93237276E-02                |
| Rb   | DCB-1e           | ANO-RCC-VDZP | -2989.58353577         | -1.65029862E-01                    | -1.65029862E-01                |
| Rb   | DCG-1e2e         | ANO-RCC-MB   | -2989.57808707         | -2.54348217E-04                    | -2.54348209E-04                |
| Rb   | DCG-1e2e         | ANO-RCC-VDZ  | -2989.58340243         | -2.93237276E-02                    | -2.93237276E-02                |
| Rb   | DCG-1e2e         | ANO-RCC-VDZP | -2989.58353577         | -1.65029862E-01                    | -1.65029862E-01                |
| Rb   | DCB-1e2e         | ANO-RCC-MB   | -2989.57808707         | -2.54348217E-04                    | -2.54348209E-04                |
| Rb   | DCB-1e2e         | ANO-RCC-VDZ  | -2989.58340243         | -2.93237276E-02                    | -2.93237276E-02                |
| Rb   | DCB-1e2e         | ANO-RCC-VDZP | -2989.58353577         | -1.65029862E-01                    | -1.65029862E-01                |
| Cs   | DC-1e2e          | ANO-RCC-MB   | -8051.50915614         | -2.97025801E-04                    | -2.97025799E-04                |
| Cs   | DC-1e2e          | ANO-RCC-VDZ  | -8051.57094011         | -2.52678284E-02                    | -2.52678285E-02                |
| Cs   | DCG-1e           | ANO-RCC-MB   | -8051.50915614         | -2.97025801E-04                    | -2.97025799E-04                |
| Cs   | DCG-1e           | ANO-RCC-VDZ  | -8051.57094011         | -2.52678284E-02                    | -2.52678285E-02                |
| Cs   | DCB-1e           | ANO-RCC-MB   | -8051.50915614         | -2.97025801E-04                    | -2.97025799E-04                |
| Cs   | DCB-1e           | ANO-RCC-VDZ  | -8051.57094011         | -2.52678284E-02                    | -2.52678285E-02                |
| Cs   | DCG-1e2e         | ANO-RCC-MB   | -8051.50915614         | -2.97025801E-04                    | -2.97025799E-04                |
| Cs   | DCG-1e2e         | ANO-RCC-VDZ  | -8051.57094011         | -2.52678284E-02                    | -2.52678285E-02                |
| Cs   | DCB-1e2e         | ANO-RCC-MB   | -8051.50915614         | -2.97025801E-04                    | -2.97025799E-04                |
| Cs   | DCB-1e2e         | ANO-RCC-VDZ  | -8051.57094011         | -2.52678284E-02                    | -2.52678285E-02                |
| Fr   | DC-1e2e          | ANO-RCC-VDZ  | -28955.29686485        | -2.81453993E-02                    | -                              |
| Fr   | DCG-1e           | ANO-RCC-VDZ  | -28955.29686485        | -2.81453993E-02                    | -                              |
| Fr   | DCB-1e           | ANO-RCC-VDZ  | -28955.29686485        | -2.81453993E-02                    | -                              |
| Fr   | DCG-1e2e         | ANO-RCC-VDZ  | -28955.29686485        | -2.81453993E-02                    | -                              |
| Fr   | DCB-1e2e         | ANO-RCC-VDZ  | -28955.29686485        | -2.81453993E-02                    | -                              |

Table S11: Time required to perform a variety of  $X2C_{mmf}$  transformation for a variety of basis for a Sodium atom.

| Atom | Basis        | $X2C_{mmf}$ Type | Transformation Time [sec] |
|------|--------------|------------------|---------------------------|
| Na   | ANO-RCC-VDZ  | DC-1e2e          | 1.2531                    |
| Na   | ANO-RCC-VDZ  | DCG-1e           | 1.2207                    |
| Na   | ANO-RCC-VDZ  | DCB-1e           | 1.2106                    |
| Na   | ANO-RCC-VDZ  | DCB-1e2e         | 1.9817                    |
| Na   | ANO-RCC-VDZ  | DCB-1e2e         | 10.2324                   |
| Na   | ANO-RCC-VDZP | DC-1e2e          | 2.6609                    |
| Na   | ANO-RCC-VDZP | DCG-1e           | 2.76                      |
| Na   | ANO-RCC-VDZP | DCB-1e           | 2.8776                    |
| Na   | ANO-RCC-VDZP | DCG-1e2e         | 4.4292                    |
| Na   | ANO-RCC-VDZP | DCB-1e2e         | 23.662                    |
| Na   | ANO-RCC-VTZP | DC-1e2e          | 11.5411                   |
| Na   | ANO-RCC-VTZP | DCG-1e           | 11.555                    |
| Na   | ANO-RCC-VTZP | DCB-1e           | 11.5175                   |
| Na   | ANO-RCC-VTZP | DCG-1e2e         | 20.0802                   |
| Na   | ANO-RCC-VTZP | DCB-1e2e         | 64.6176                   |
| Na   | ANO-RCC-VQZP | DC-1e2e          | 55.9794                   |
| Na   | ANO-RCC-VQZP | DCG-1e           | 56.7785                   |
| Na   | ANO-RCC-VQZP | DCB-1e           | 56.455                    |
| Na   | ANO-RCC-VQZP | DCG-1e2e         | 113.3471                  |
| Na   | ANO-RCC-VQZP | DCB-1e2e         | 180.4449                  |
