# Supplementary material
Source: Royal Society of Chemistry journal article supplement (doi:10.1039/d6cp01222a)

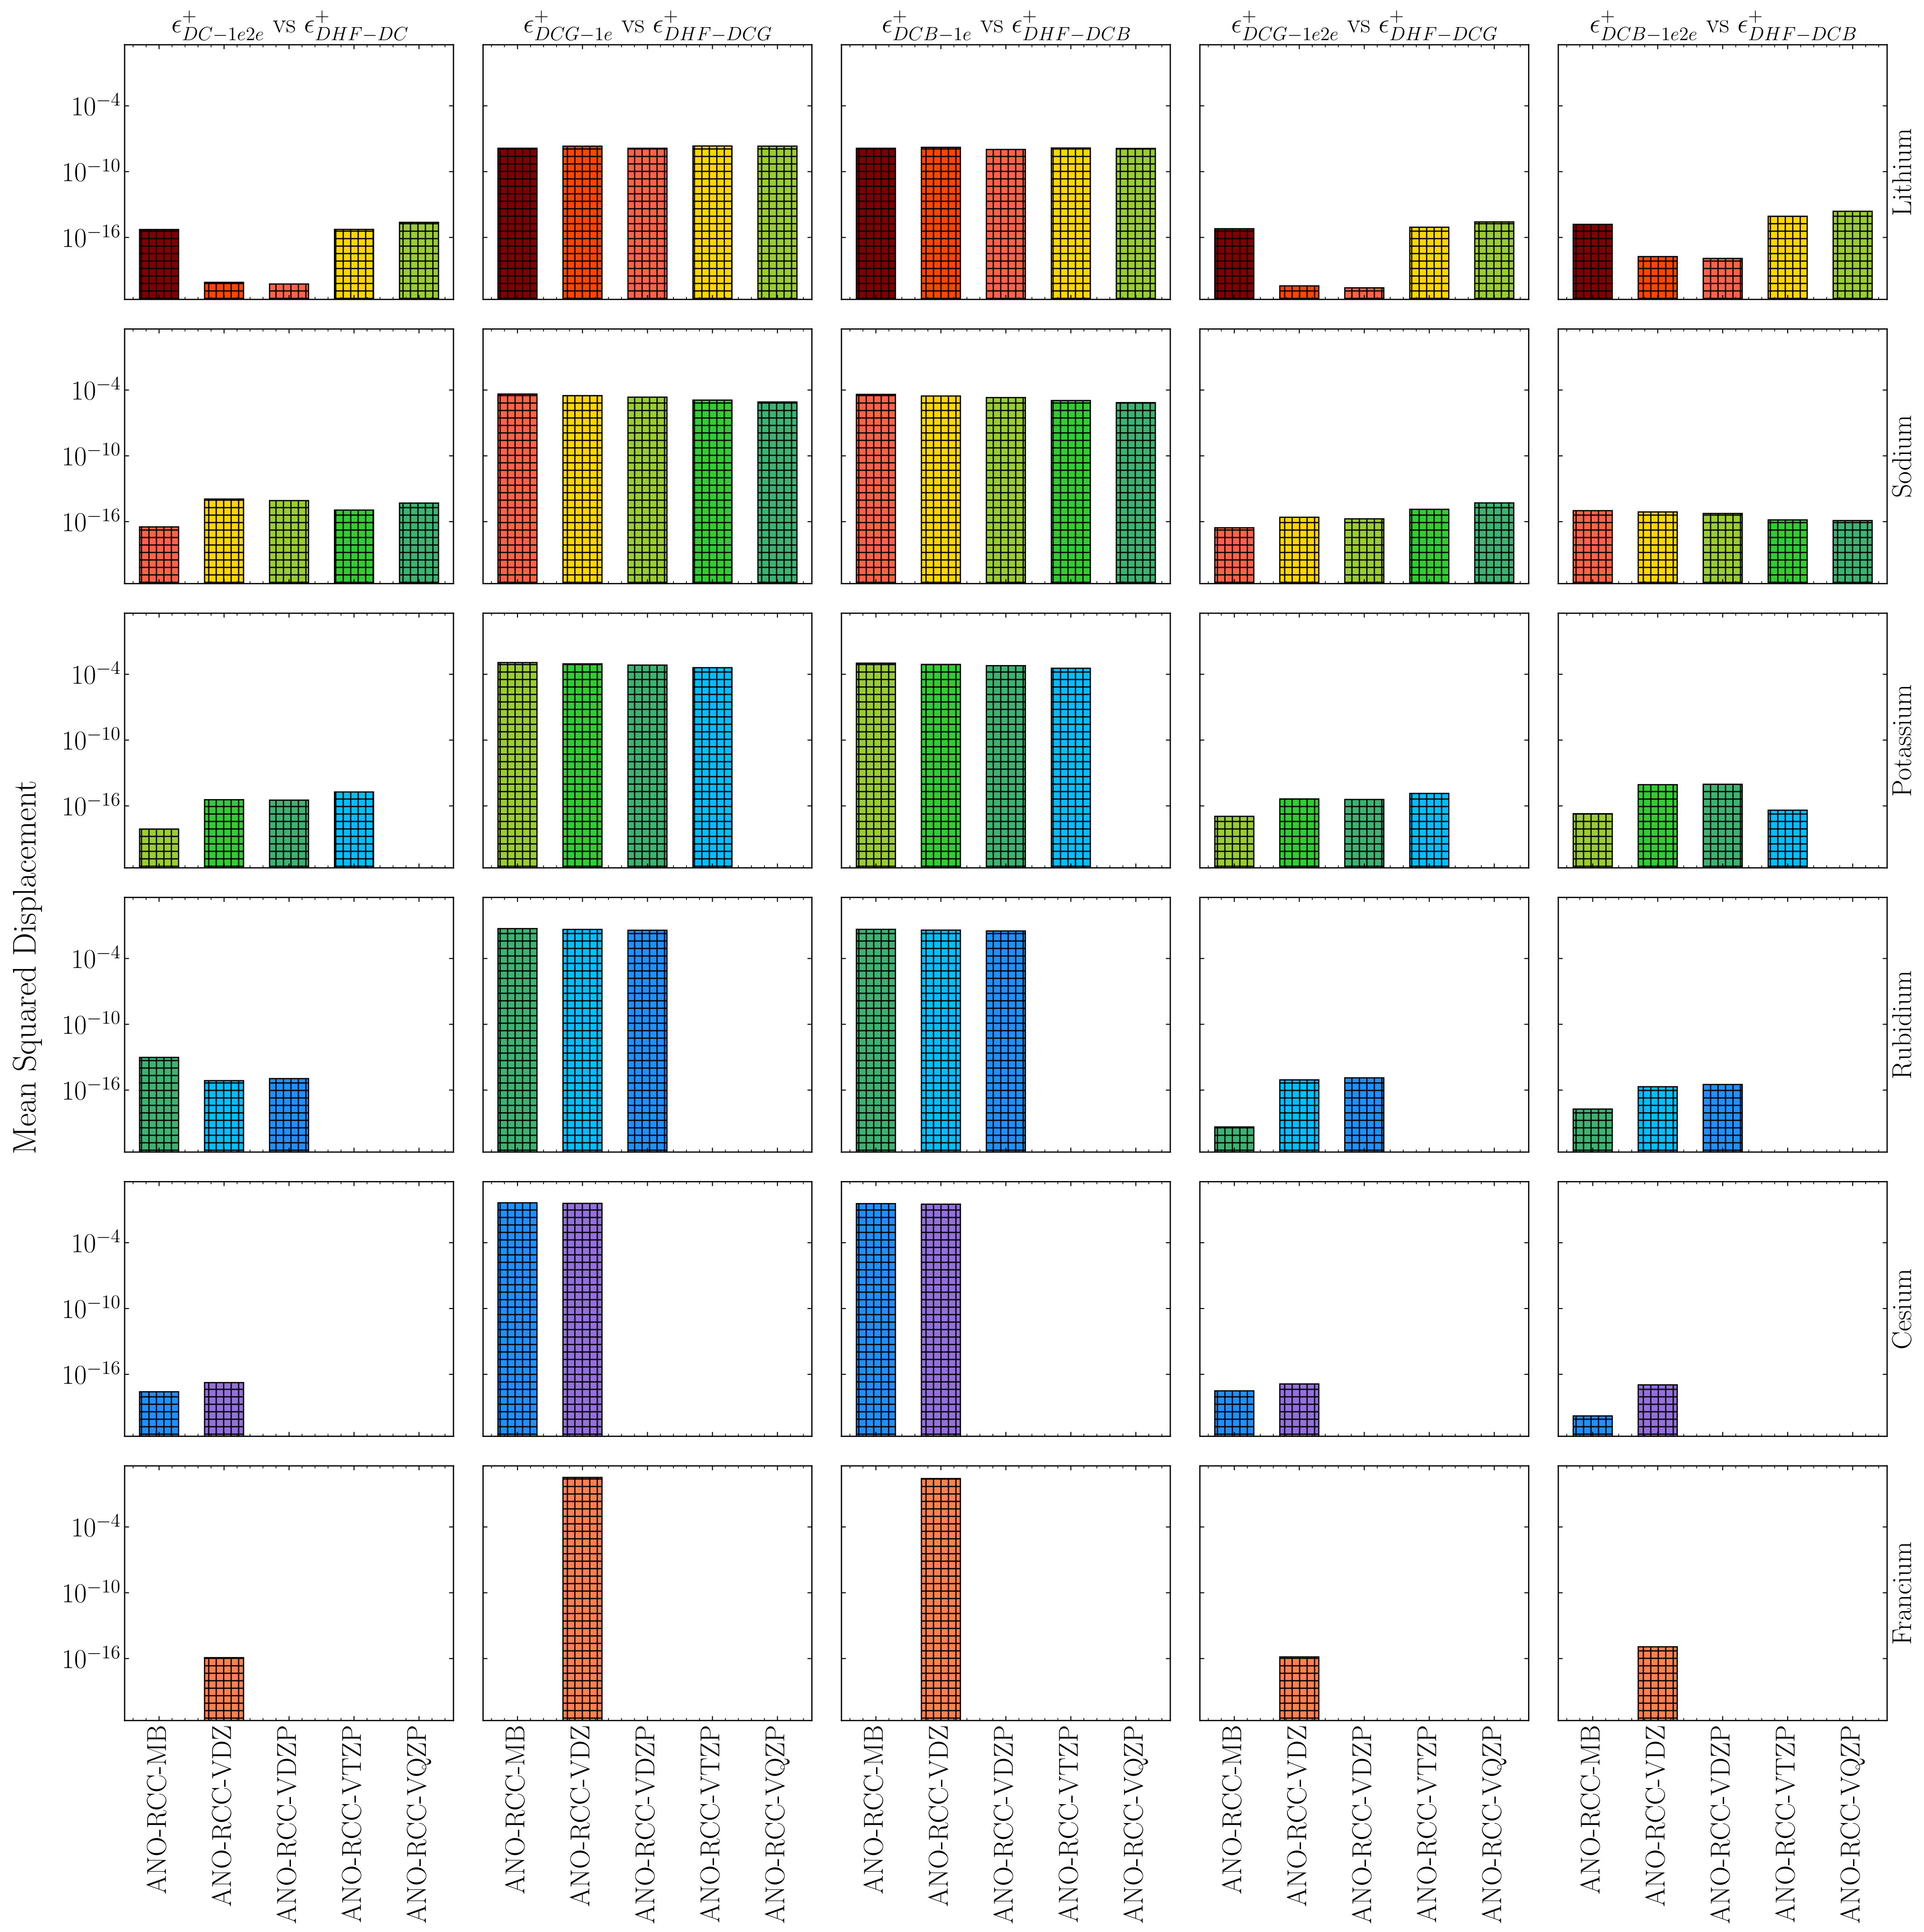

Supplement: d6cp01222a2.zip [file box_plot.pdf › box_plot.pdf]

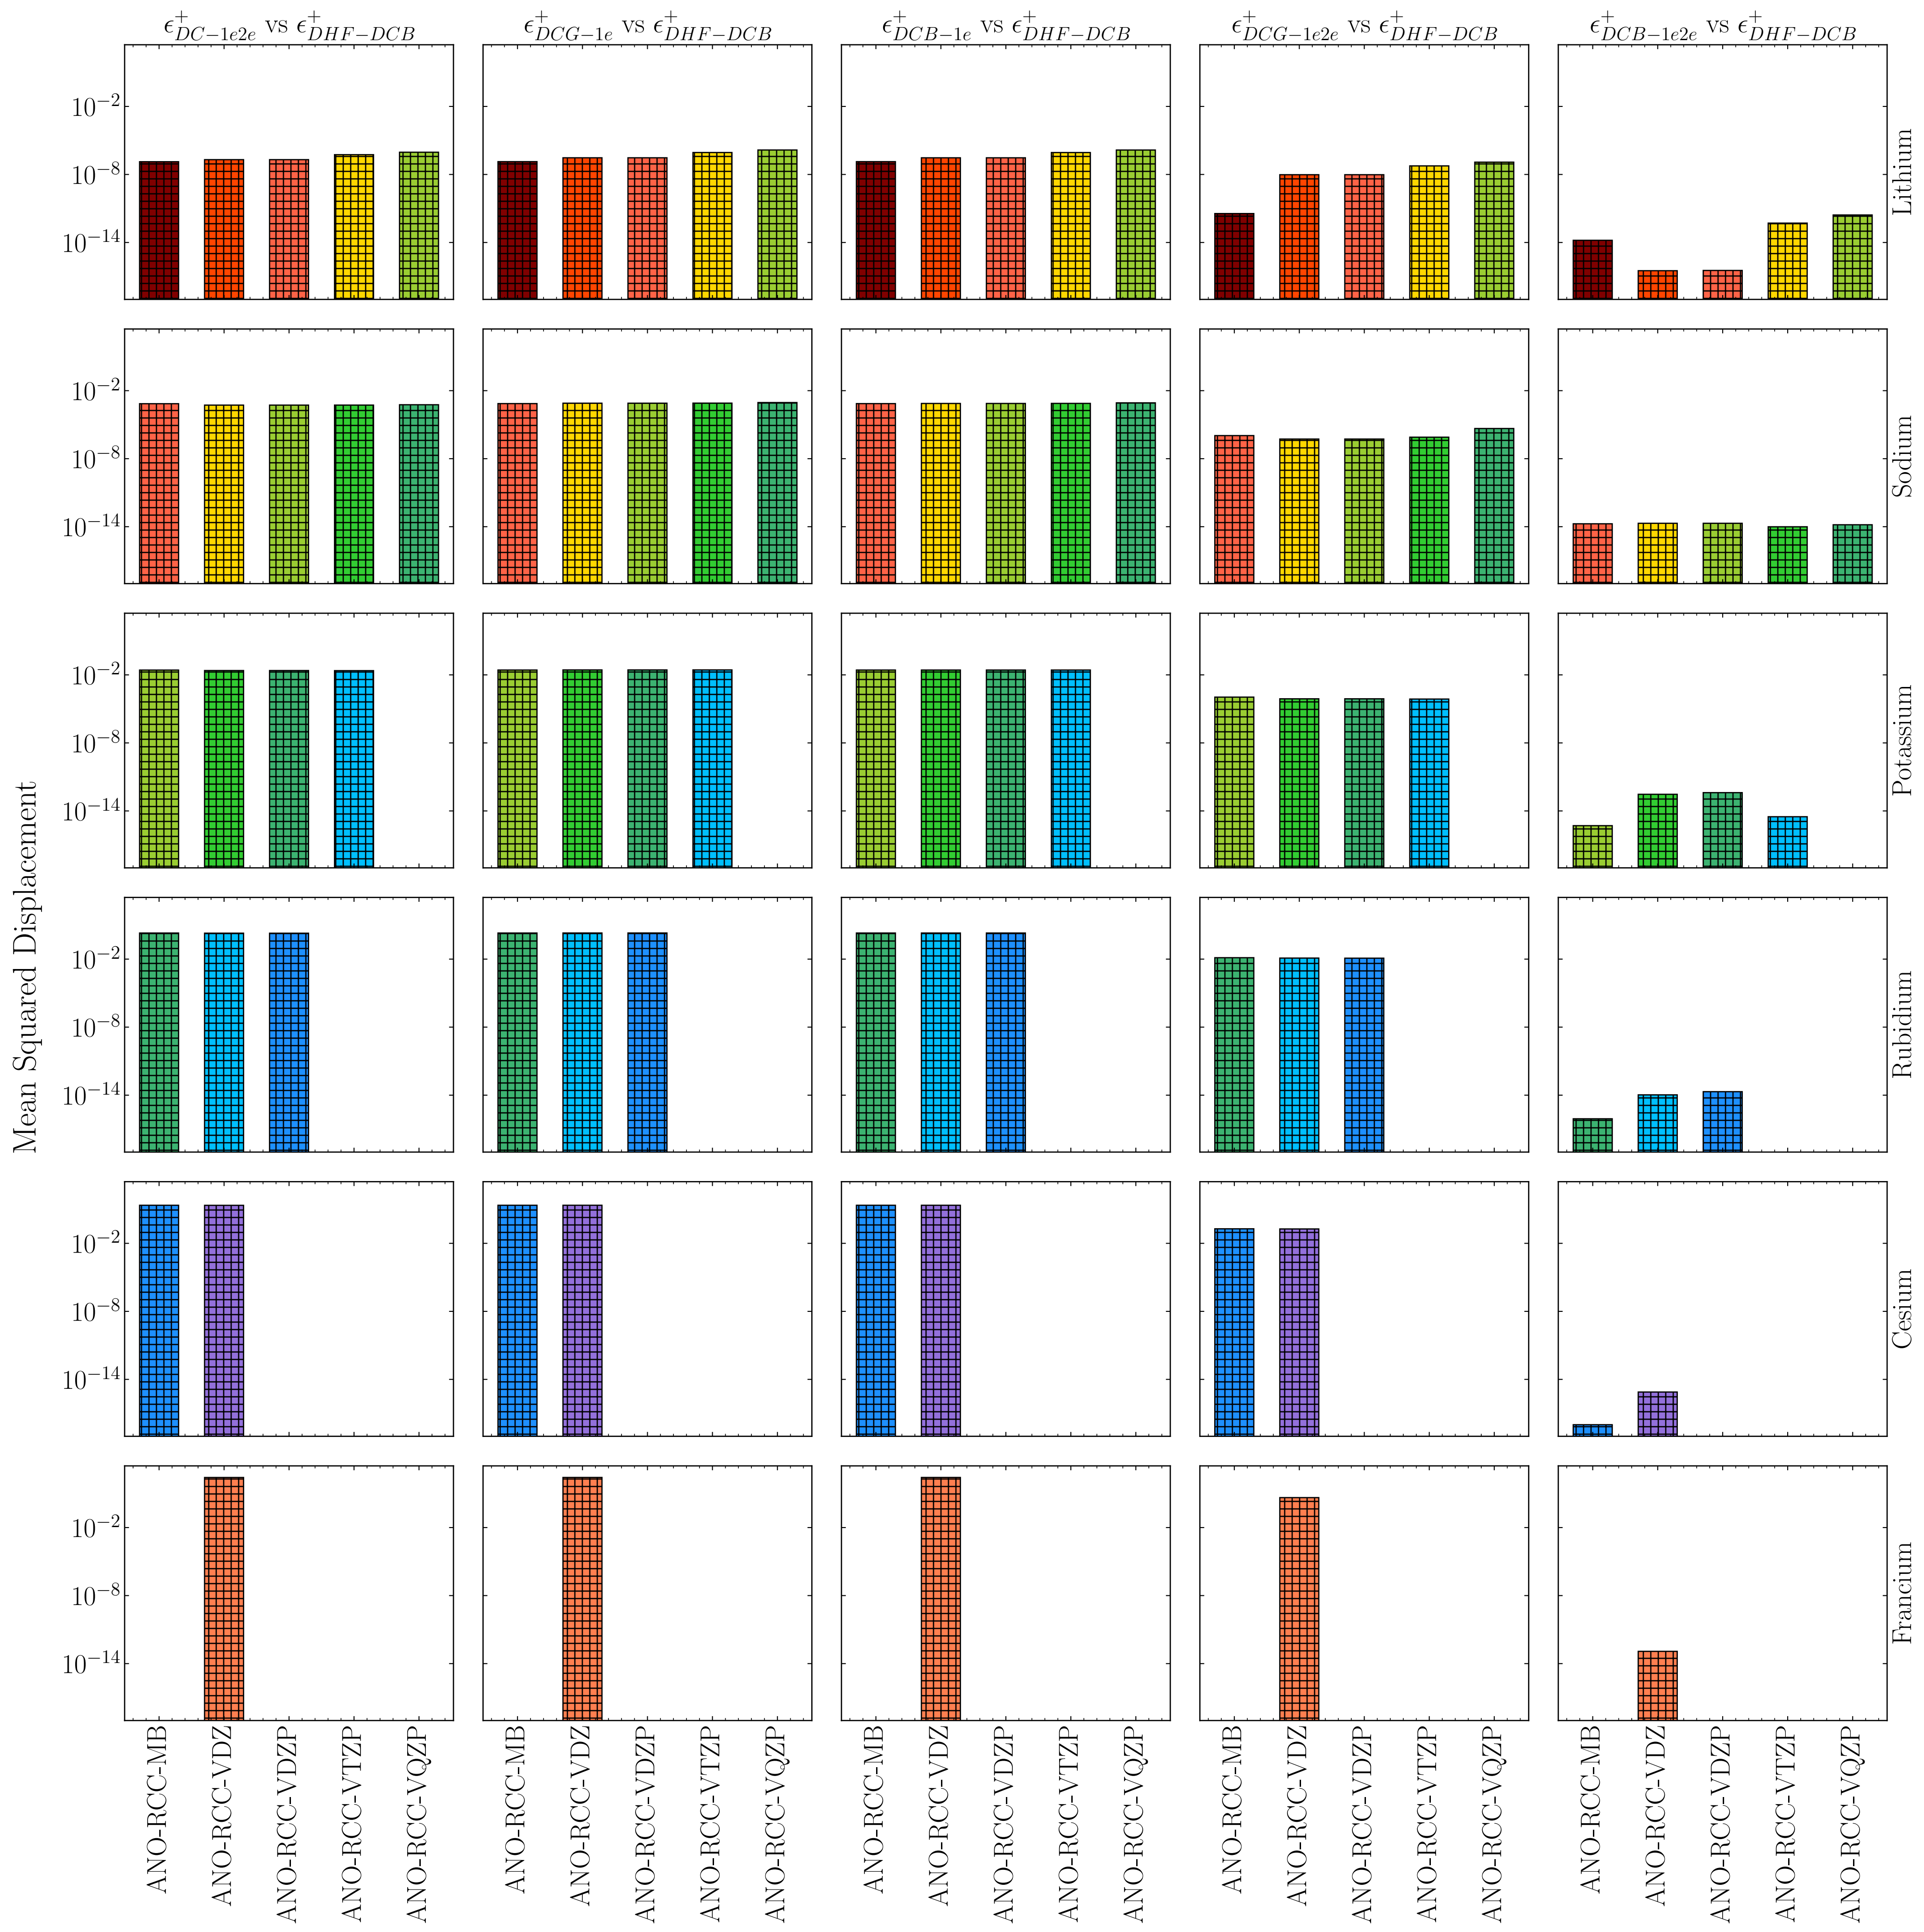

Supplement: d6cp01222a2.zip [file box_plot1.pdf › box_plot1.pdf]

Mean Squared Displacement

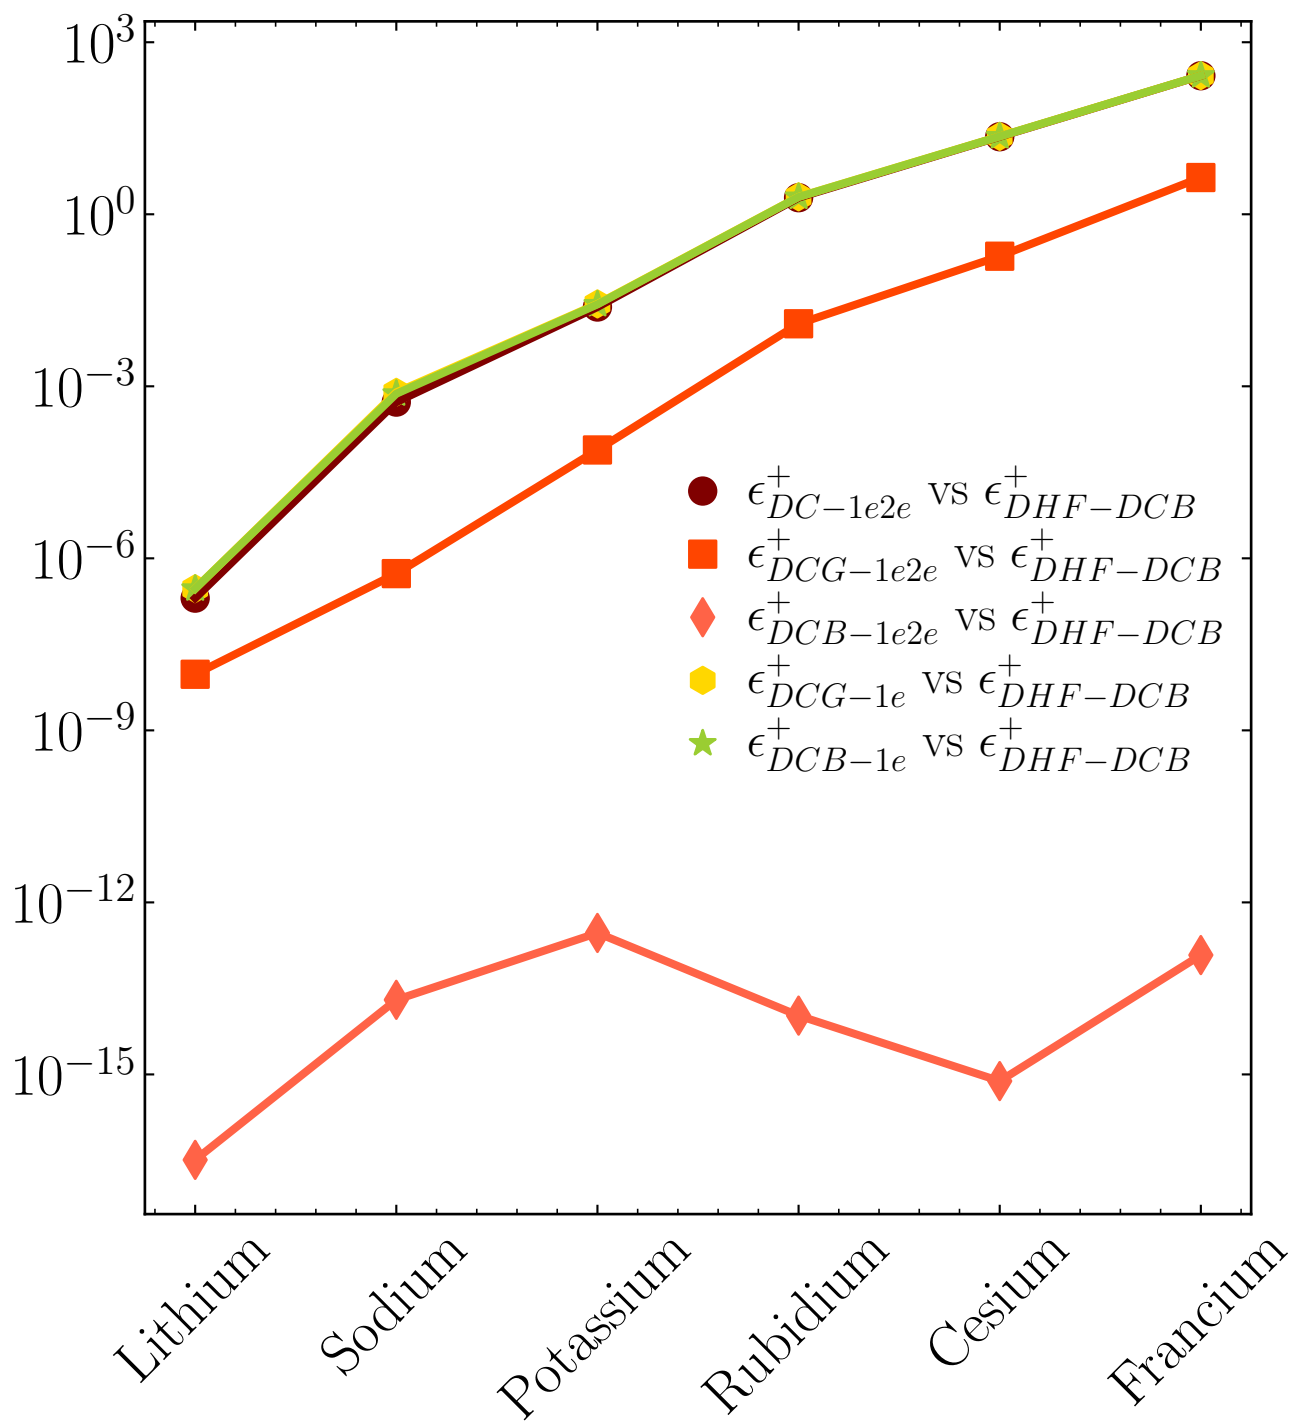

Supplement: d6cp01222a2.zip [file box_plot1_r2.pdf › box_plot1_r2.pdf]

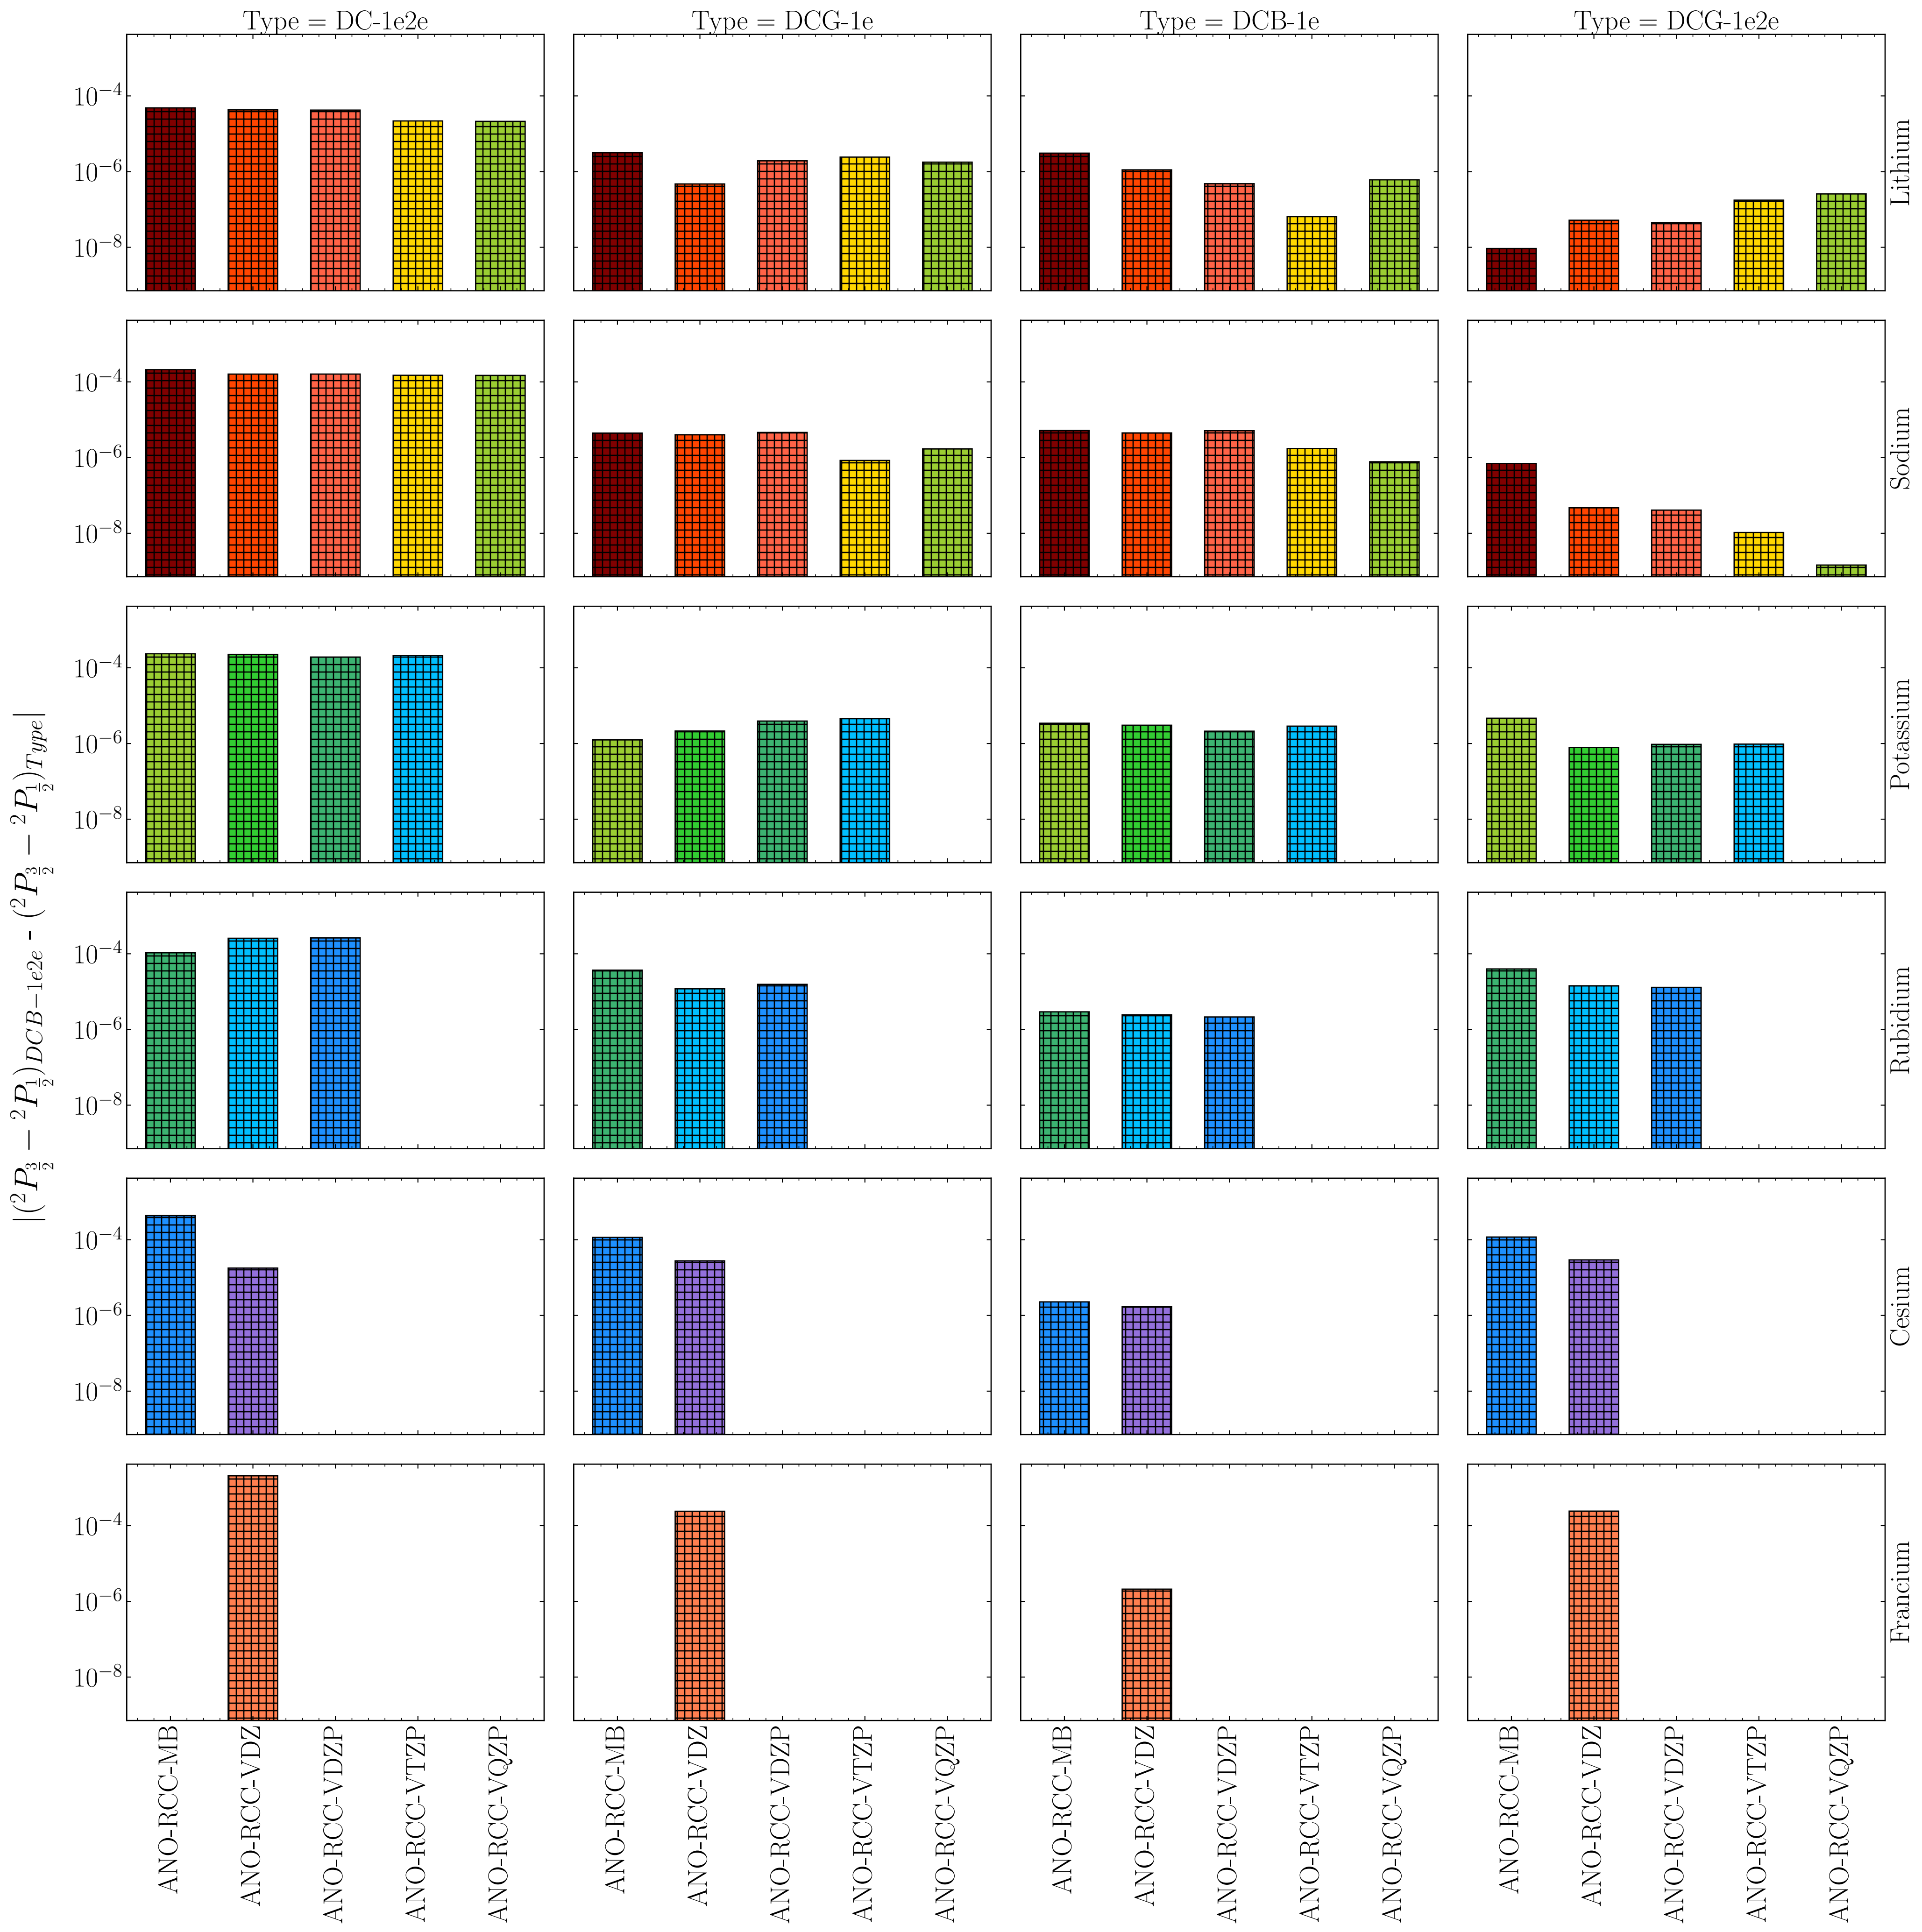

Supplement: d6cp01222a2.zip [file box_plot2.pdf › box_plot2.pdf]

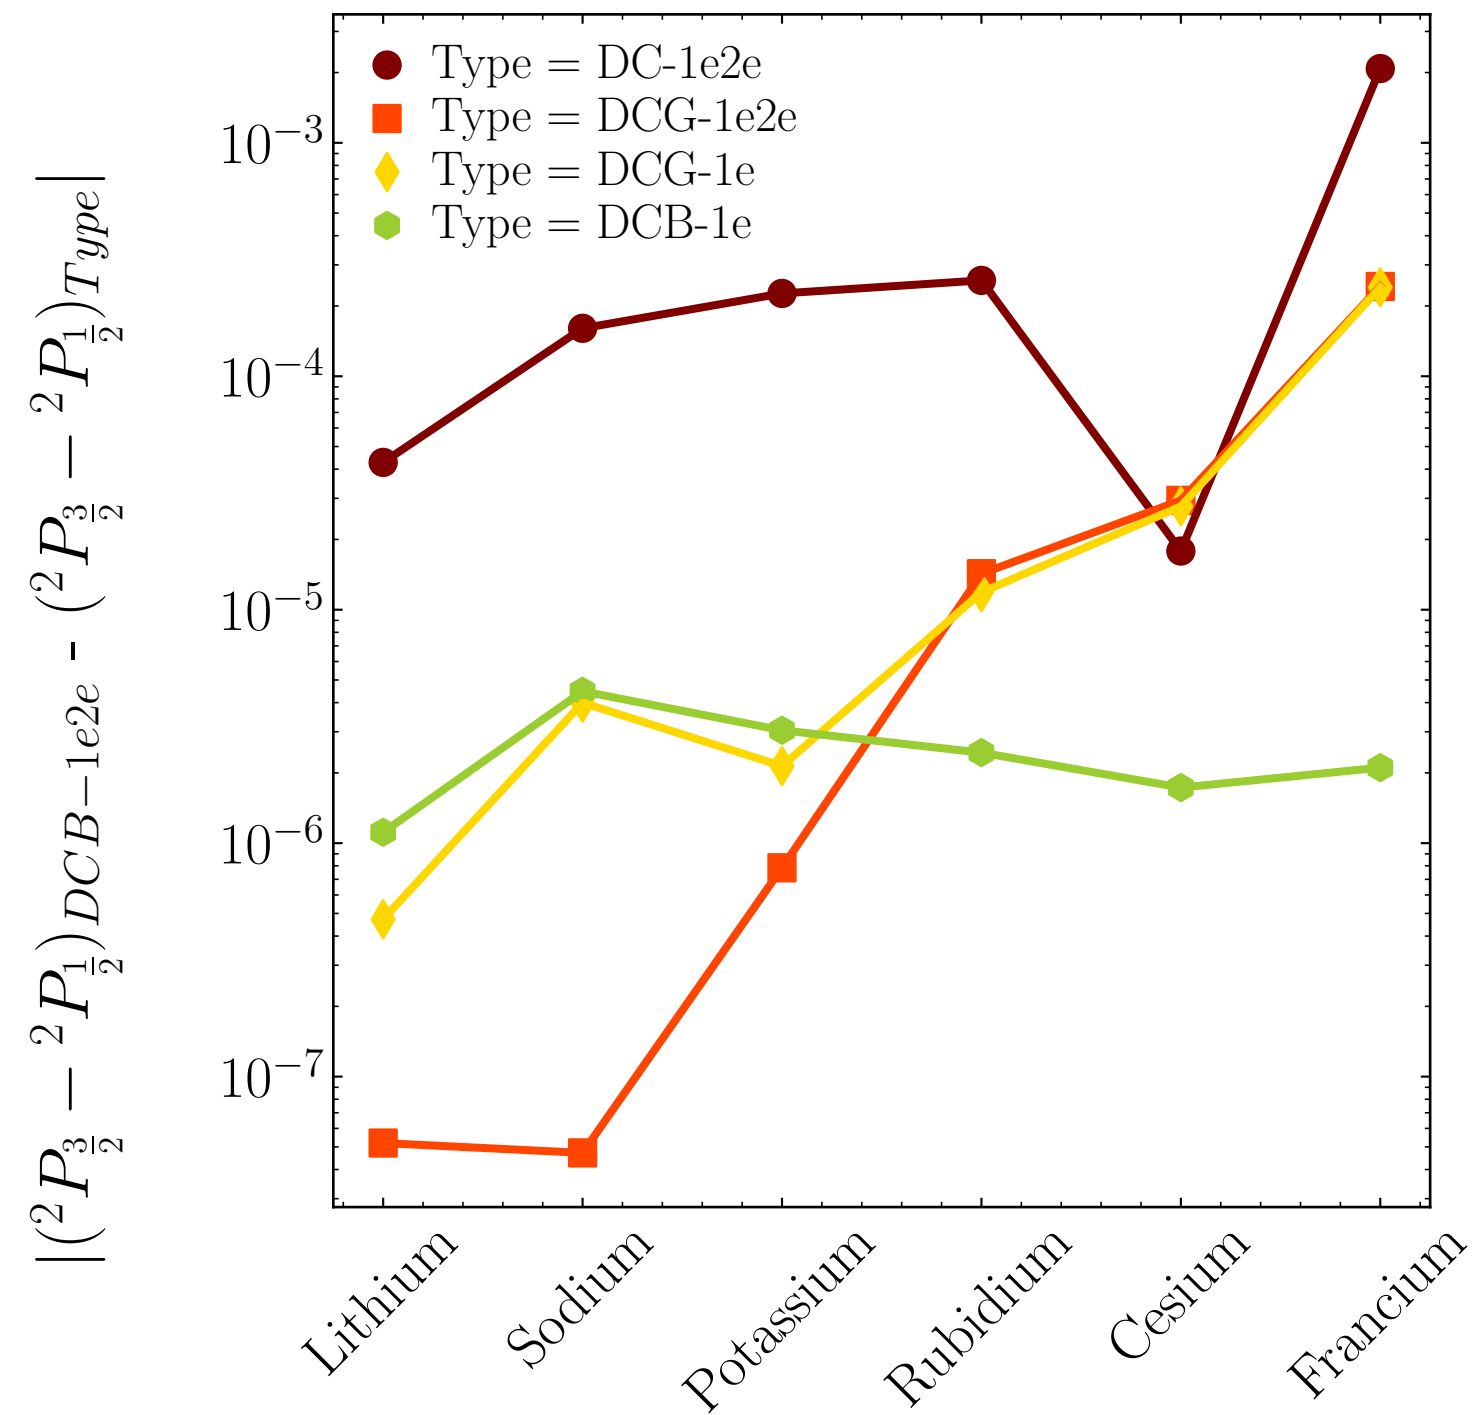

Supplement: d6cp01222a2.zip [file box_plot2_r2.pdf › box_plot2_r2.pdf]

Mean Squared Displacement

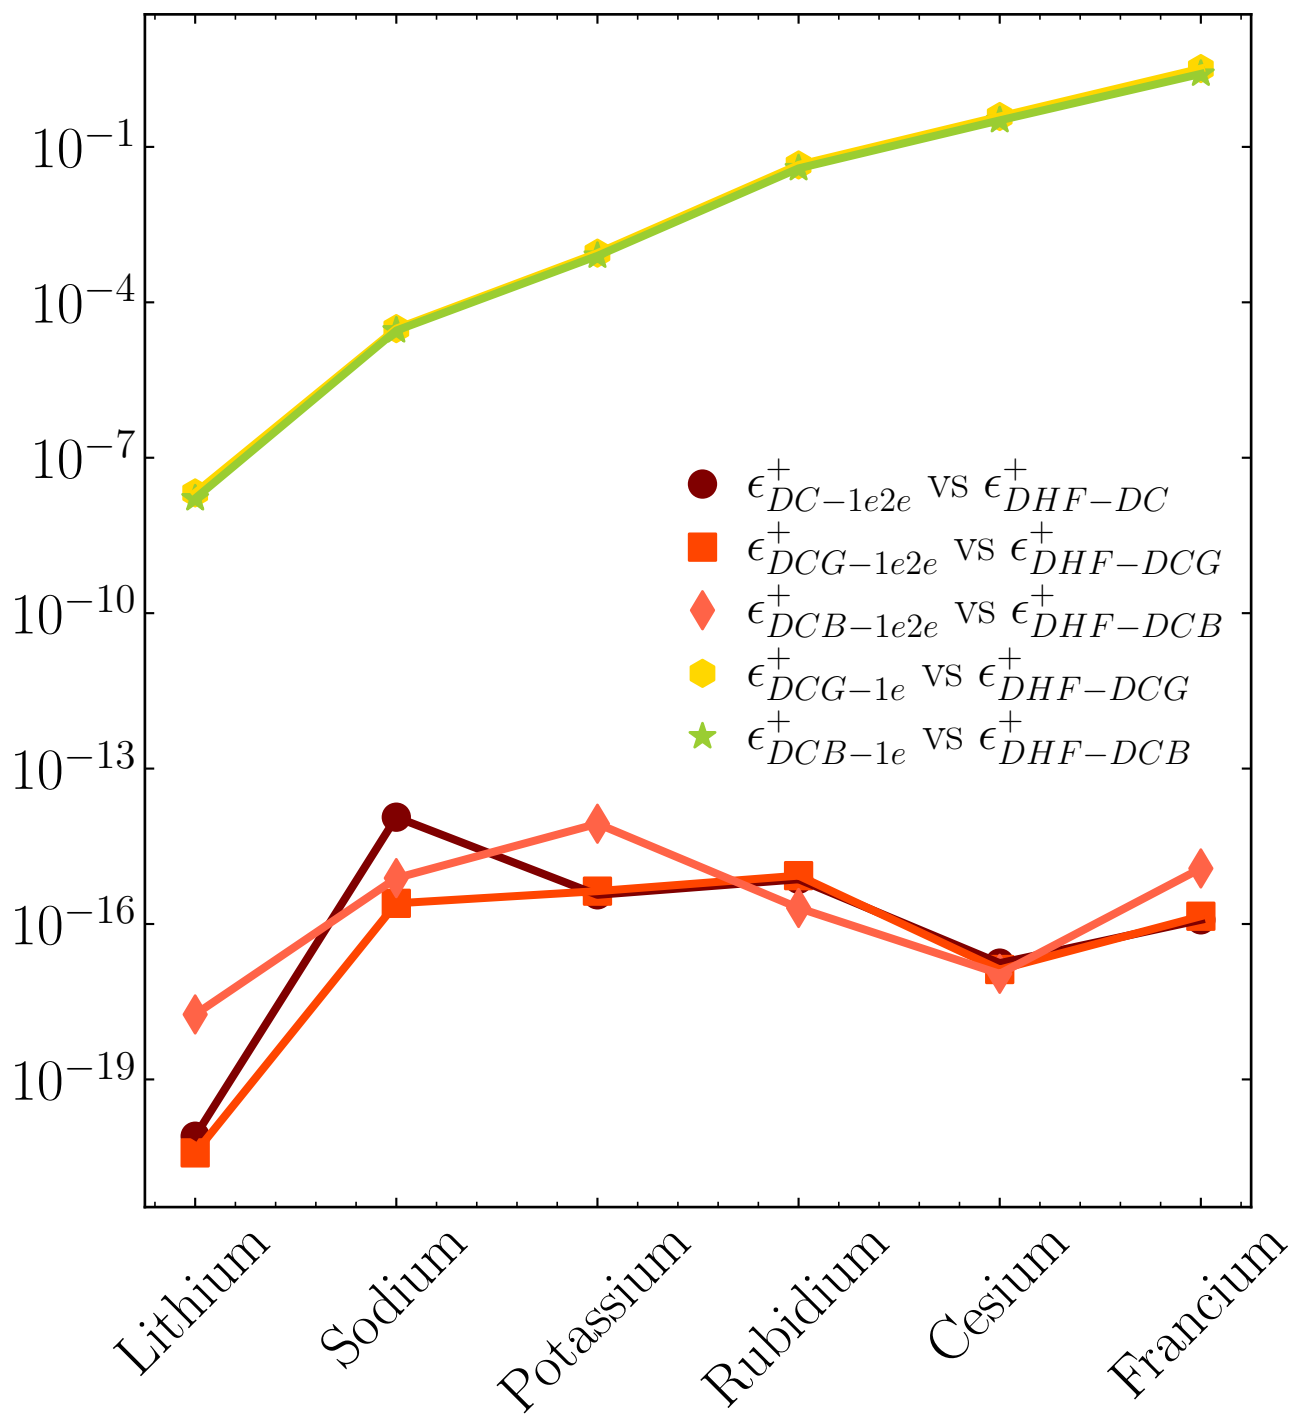

Supplement: d6cp01222a2.zip [file box_plot_r2.pdf › box_plot_r2.pdf]
